# Supplementary material
Source: publisher site journal article supplement (https://www.spandidos-publications.com/7579/downloadSupplementary)
Supplement: Supplementary file 1 [file downloadSupplementary]

## Sheet: Table SXI
Table SXI. Results of KEGG pathway enrichment analysis.
ID	Description	GeneRatio	BgRatio	P-value	p.adjust	qvalue	geneID	Count
hsa04613	Neutrophil extracellular trap formation	76/1499	192/8843	4.24555e-14	1.44349e-11	1.18429e-11	2209/10000/723790/8337/3017/8351/834/8349/837/85236/3013/8365/8360/5335/8338/3684/440689/1432/55766/4689/3012/1535/2357/820/8344/27180/440093/23569/3021/8520/3020/8329/1378/5880/366/8363/9759/7097/2212/8362/8367/79792/6404/8334/8339/653361/54145/1379/3674/126961/333932/5595/8347/2358/8357/6403/102724334/8356/8336/7099/4353/3014/8970/8348/8332/653604/1511/1991/8294/8364/8343/2215/8353/566/6300/102…	76
hsa05322	Systemic lupus erythematosus	59/1499	139/8843	9.35751e-13	1.59078e-10	1.30513e-10	2209/723790/8337/3017/714/3586/959/713/8351/8349/85236/3013/8365/8360/8338/440689/712/940/55766/3012/717/8344/440093/3021/6737/3020/8329/8363/2212/8362/8367/8334/8339/54145/126961/333932/3111/715/8347/8357/102724334/8356/8336/3014/8970/8348/8332/653604/1511/1991/8294/8364/8343/2215/721/720/8353/732/102723407	59
hsa05202	Transcriptional misregulation in cancer	67/1499	193/8843	1.21603e-09	1.37816e-07	1.13069e-07	64919/2209/4297/2308/5468/8351/597/4616/1647/4005/3684/472/26471/1031/7030/4318/1051/8464/929/2005/1050/440093/1026/6688/3021/7850/3020/604/578/10912/8900/648/5077/51513/5371/4298/5079/5914/126961/3248/3486/333932/4086/1668/1053/8357/8356/5328/4353/653604/2078/1991/728358/4066/890/2322/1669/1667/8353/7113/171558/4233/598/3479/102723407/1670/7102	67
hsa05034	Alcoholism	59/1499	188/8843	6.64744e-07	5.50933e-05	4.52004e-05	723790/8337/2787/3017/814/8351/8349/85236/3013/8365/8360/8338/440689/55766/3012/5569/8344/440093/3021/8520/3020/10645/8329/5567/8363/9759/2783/2790/8362/8367/8334/8339/54145/4129/126961/90993/5173/333932/3177/5595/8347/8357/102724334/8356/8336/4128/135/3014/8970/2791/8348/8332/653604/8294/8364/8343/116443/8353/2786	59
hsa04621	NOD-like receptor signaling pathway	59/1499	189/8843	8.10196e-07	5.50933e-05	4.52004e-05	7295/9447/4615/58484/7188/834/837/7226/114769/3606/84674/838/1432/596/4671/1508/8772/5580/11345/1535/820/11337/3665/29108/3428/7205/10616/10379/2634/4938/63940/79792/3320/91662/3553/10135/4792/5595/2633/643246/1668/64127/7099/199713/115362/4940/728358/81858/2635/6347/4939/1669/1667/171389/6300/5602/598/115361/1670	59
hsa04060	Cytokine-cytokine receptor interaction	83/1499	298/8843	1.1793e-06	6.68271e-05	5.48272e-05	3575/93/1235/3586/10913/959/56477/3588/643/1233/3606/5008/3460/246778/8743/94/8807/10673/8741/4055/7043/130399/3459/3601/3557/8809/3590/7850/3566/23765/91/84957/11009/1438/1230/7132/5473/657/58191/57007/9518/1441/3553/5617/29949/6369/51330/7040/3577/3627/284340/1236/115650/5196/3554/3624/149233/355/6355/1237/2829/6347/6370/6373/5197/608/10148/6387/3625/55801/3976/6354/9173/3568/3552/6368/4283/148…	83
hsa05144	Malaria	23/1499	50/8843	1.59286e-06	7.73676e-05	6.3475e-05	4615/3586/959/3606/7043/1378/3383/7097/3553/1379/3082/7040/2993/6403/6382/7099/2994/6347/7057/2532/6383/4233/3043	23
hsa04061	Viral protein interaction with cytokine and cytokine receptor	35/1499	100/8843	9.02711e-06	0.000383652	0.000314761	1235/3586/56477/3588/643/1233/3606/8743/8807/4055/8809/11009/1230/7132/5473/57007/29949/6369/3577/3627/1236/5196/6355/1237/2829/6347/6370/6373/5197/6387/6354/6368/4283/6362/6364	35
hsa04640	Hematopoietic cell lineage	34/1499	99/8843	1.91521e-05	0.000723522	0.000593602	2209/3575/966/3655/3684/917/1380/929/1604/3590/7850/3566/921/1378/1438/1441/3553/1379/3815/2812/3674/2993/911/3111/913/3554/933/931/2815/2322/100133941/3568/3552/102723407	34
hsa04380	Osteoclast differentiation	44/1499	142/8843	2.44598e-05	0.000801344	0.00065745	2209/10000/353514/5468/814/11006/126014/4773/79168/9021/3460/1432/5608/4689/7305/8061/1535/11025/3459/3726/6688/10379/8651/7132/2212/10859/10990/653361/3553/11027/5971/2213/4792/2274/7040/5595/140885/3554/23547/2215/54/6300/3552/5602	44
hsa00190	Oxidative phosphorylation	43/1499	138/8843	2.59258e-05	0.000801344	0.00065745	529/4709/8992/51382/1337/1347/1329/4694/9551/522/4695/10063/509/4712/4707/10632/100532726/1340/10975/29796/4697/9114/1349/539/521/27089/9296/528/533/4725/7388/1351/125965/10312/51079/440567/4724/4701/4509/7381/4713/527/1345	43
hsa04145	Phagosome	47/1499	157/8843	3.51703e-05	0.000996492	0.000817555	529/2209/8992/51382/2204/3684/8685/10952/10376/1514/4689/84790/929/1535/79659/9114/10383/9296/6890/528/533/23480/3107/3105/7277/10312/7097/2212/653361/7846/2213/3111/4973/715/7099/4353/10381/527/2215/51807/4481/83547/7057/3135/347733/102723407/7280	47
hsa05020	Prion disease	73/1499	278/8843	4.67699e-05	0.00122321	0.00100356	4709/5710/714/5687/713/5683/1337/1347/1329/4694/3800/5691/5685/522/4695/509/4712/712/1432/4707/100532726/1340/10376/10975/3310/29796/4689/5694/5580/84790/4697/1535/10383/1349/539/27089/4725/5880/7388/1351/5567/125965/7277/51079/572/440567/3304/4684/4724/4701/653361/3553/3303/7846/90993/5595/4509/7381/3798/4713/10381/1345/857/51807/116443/347733/6300/147700/6262/732/3552/5602/7280	73
hsa04610	Complement and coagulation cascades	30/1499	88/8843	6.81308e-05	0.00165461	0.00135749	714/713/719/966/3684/712/1380/5265/1604/5055/717/5329/1191/11326/1378/710/2153/629/7035/2161/1379/715/5328/5627/2152/721/720/1675/624/732	30
hsa04814	Motor proteins	54/1499	197/8843	0.000135745	0.00307689	0.00252438	6993/4637/103910/10627/11127/347240/140465/3800/8632/57519/10376/1768/4651/84790/829/79659/10383/23095/7277/7138/55605/200132/7136/830/24137/146909/4646/7846/3801/59/9928/3833/3798/10398/4647/146439/10381/3832/9493/10112/3797/56992/7283/11004/343521/1062/4648/51807/347733/147700/23026/4635/81930/7280	54
hsa05150	Staphylococcus aureus infection	32/1499	100/8843	0.000156054	0.00331615	0.00272068	2209/714/3586/713/719/2204/3684/712/2357/820/717/3383/2212/629/6404/2213/3111/1668/715/2358/1672/6403/2215/728358/721/720/1675/1669/1667/3857/102723407/1670	32
hsa05140	Leishmaniasis	26/1499	77/8843	0.000242874	0.00485747	0.00398523	2209/4615/3586/3684/3460/1432/4689/7043/1535/3459/1378/7097/2212/653361/3553/1379/4792/7040/5595/3717/3111/7099/2215/6300/3552/102723407	26
hsa05132	Salmonella infection	64/1499	251/8843	0.000329784	0.00622926	0.00511069	7295/10000/5287/6993/51176/103910/2597/4615/10627/6932/10094/58484/7100/23643/834/79026/837/3800/3606/838/127829/1432/596/5608/4671/10376/8743/8772/84790/929/10095/8677/197259/79659/113146/5063/391/29108/10383/578/7277/6237/27128/7097/7132/79792/3320/5606/4646/3553/7846/4792/5595/3798/10398/7099/10381/51807/83547/347733/6300/147700/5602/7280	64
hsa05012	Parkinson disease	68/1499	271/8843	0.000356842	0.00638559	0.00523895	7295/4709/5710/5687/5683/1337/1347/1329/4694/27173/3800/5691/5685/522/4695/5335/509/4712/4707/100532726/1340/10376/10975/29796/5694/84790/4697/7316/10383/1349/539/51465/27089/4725/7388/1351/5567/125965/7277/51079/9246/440567/1843/4724/4701/7846/4129/7345/65018/4509/7381/3798/4128/4713/10381/135/5071/5413/1345/51807/7314/64116/347733/147700/6622/5602/598/7280	68
hsa04110	Cell cycle	44/1499	158/8843	0.000377566	0.00641862	0.00526605	4616/9587/1647/1870/472/9978/10459/1031/1032/7043/896/1026/1869/9088/10912/990/8900/9133/8318/983/9212/995/113130/991/7027/7272/9232/993/7040/699/5347/9700/701/81620/891/90381/157570/9319/890/1111/4998/10403/85417/57082	44
hsa04217	Necroptosis	44/1499	159/8843	0.000438242	0.00709535	0.00582126	723790/8337/7188/834/3013/8338/3460/51510/3718/596/55766/8743/8772/3012/197259/3459/5321/5836/29108/2512/27243/8329/10616/10379/2495/7132/3320/81030/8334/3553/124044/5610/3717/8336/7099/3014/355/92421/8332/81858/3552/5602/90865/246	44
hsa05145	Toxoplasmosis	33/1499	111/8843	0.000565392	0.00873788	0.00716885	10000/4615/3586/959/23643/3588/3655/3460/1432/596/5608/3310/7043/240/3459/8651/7097/7132/572/3304/5606/3303/3908/3914/4792/7040/5595/3717/3111/7099/6300/5602/598	33
hsa05323	Rheumatoid arthritis	29/1499	94/8843	0.000616355	0.00911134	0.00747525	529/8992/51382/3606/940/1514/10673/8741/7043/9114/9296/528/533/3383/10312/7097/284/3553/7040/3111/7099/527/4312/6347/54/6387/3552/102723407/6364	29
hsa04672	Intestinal immune network for IgA production	18/1499	49/8843	0.000692232	0.00980661	0.00804567	3586/959/56477/940/10673/8741/4055/3601/7040/3111/115650/6370/5284/608/6387/57379/102723407/23495	18
hsa04514	Cell adhesion molecules	42/1499	157/8843	0.00122821	0.0160612	0.0131772	4897/959/4359/3655/3684/25945/84628/940/6402/965/5819/4756/80380/29126/5802/3107/3105/64115/3383/57555/6404/9080/4684/9672/3111/6614/6403/6382/1000/26047/933/90952/3680/49861/51208/3135/3696/6383/80381/8516/23114/5792	42
hsa04932	Non-alcoholic fatty liver disease	42/1499	157/8843	0.00122821	0.0160612	0.0131772	4709/10000/5468/1337/1347/1329/4694/9021/4695/4712/1432/4707/100532726/1340/10975/29796/4697/1050/1349/27089/4725/7388/1351/125965/51079/7132/440567/4724/4701/3553/7040/4296/7381/10062/4713/1571/355/1345/6300/51094/3552/5602	42
hsa05134	Legionellosis	19/1499	56/8843	0.00150974	0.0190116	0.0155977	4615/58484/7100/834/3606/3684/4671/3310/929/29108/1378/7097/81876/3304/3553/1379/3303/4792/7099	19
hsa04062	Chemokine signaling pathway	49/1499	193/8843	0.00173674	0.0206951	0.0169789	10000/2787/1235/56477/643/1233/3702/5335/3718/2268/5580/7074/409/3055/7409/196883/5880/5567/2783/2790/1230/572/5473/58191/653361/4792/6369/5595/3717/3577/3627/1236/109/5196/2791/6355/1237/2829/6347/6370/6373/5197/6387/2786/6354/6368/4283/6362/6364	49
hsa05321	Inflammatory bowel disease	21/1499	65/8843	0.00176517	0.0206951	0.0169789	3586/7100/2625/3606/6095/3460/8807/7043/3459/8809/3566/6097/7097/3553/7040/3111/64127/7099/149233/3552/59067	21
hsa05152	Tuberculosis	46/1499	180/8843	0.00205449	0.0232842	0.0191031	2209/10000/4615/3586/2207/3588/3606/3684/3460/1432/596/1509/8772/1051/929/7043/26253/820/9114/3459/533/8877/8625/1378/10312/7097/7132/2212/572/3553/1379/2213/7040/5595/3717/3111/64127/7099/527/1263/2215/3656/6300/3552/5602/102723407	46
hsa05415	Diabetic cardiomyopathy	51/1499	205/8843	0.00225963	0.024783	0.0203328	4709/10000/2597/9882/1337/1347/1329/4694/522/4695/509/4712/1432/4707/1509/100532726/1340/10975/29796/4689/4318/5580/4697/7043/1535/1349/539/27089/4725/5880/7388/1351/125965/51079/440567/4724/4701/653361/7040/4509/7381/4713/4313/1345/6513/1278/6300/1277/6262/5602/6517	51
hsa00603	Glycosphingolipid biosynthesis - globo and isoglobo series	8/1499	16/8843	0.00237984	0.0252857	0.0207453	2717/6483/6489/26301/2524/8706/127550/53947	8
hsa05208	Chemical carcinogenesis - reactive oxygen species	55/1499	226/8843	0.00262505	0.027046	0.0221894	9446/4709/10000/2053/4257/1337/1347/1329/4694/522/4695/509/4712/1432/4707/100532726/1340/10975/29796/5580/4697/1535/65010/1349/539/27089/4725/7388/1351/125965/51079/572/440567/2947/4724/4701/653361/3162/3082/4792/5595/4509/7381/1545/4713/1571/1645/1345/1950/6300/1543/4233/253152/5602/4025	55
hsa00910	Nitrogen metabolism	8/1499	17/8843	0.00383351	0.0378238	0.0310319	11238/762/771/759/765/1373/760/761	8
hsa04064	NF-kappa B signaling pathway	29/1499	105/8843	0.00401904	0.0378238	0.0310319	4615/10913/959/7188/23643/597/4616/1647/5335/472/596/7706/10673/4055/929/10912/3383/7132/3553/5971/4792/115650/5328/7099/3554/23586/6387/598/102723407	29
hsa04668	TNF signaling pathway	32/1499	119/8843	0.00407415	0.0378238	0.0310319	10000/7188/9021/1432/5608/8772/4318/79651/1051/9252/197259/3726/8809/602/3383/7132/5606/3553/4792/90993/3659/5595/3627/64127/4323/355/6347/6300/3976/5602/64285/6364	32
hsa05133	Pertussis	23/1499	78/8843	0.00411612	0.0378238	0.0310319	4615/714/3586/713/23643/834/3684/712/1432/929/29108/717/710/3553/3659/5595/715/7099/721/720/6300/3552/5602	23
hsa00512	Mucin type O-glycan biosynthesis	13/1499	36/8843	0.00444413	0.0397633	0.0326231	51301/29071/79695/114805/79623/6483/9334/2590/256435/2591/27090/10331/11227	13
hsa04115	p53 signaling pathway	22/1499	75/8843	0.00530467	0.0462459	0.0379417	9540/4616/1647/472/596/896/1026/51246/3732/10912/9133/55240/6241/983/51512/3486/891/355/1111/7057/598/3479	22
